# Supplementary material for: Oxidative Stress and Antioxidant Response in Populations of the Czech Republic Exposed to Various Levels of Environmental Pollutants
Source: MDPI journal article supplement (doi:10.3390/ijerph19063609), 2022-03-18
Supplement: s1 [file s1]

**Supplementary Table S1.** Concentrations of plasma POPs and urinary PAH metabolites in samples collected in Ceske Budejovice, a rural locality

| Variable                                         | Ceske Budejovice (N=16) (Season 1) |                    | Ceske Budejovice (N=16) (Season 2) |                     | P      |
|--------------------------------------------------|------------------------------------|--------------------|------------------------------------|---------------------|--------|
|                                                  | Mean ± SD                          | Median (min, max)  | Mean ± SD                          | Median (min, max)   |        |
| Polychlorinated biphenyls (ng/g lipid weight)    |                                    |                    |                                    |                     |        |
| PCB 28                                           | 1.04 ± 1.00                        | 0.85 (0.05, 4.30)  | 0.36 ± 0.24                        | 0.31 (0.05, 0.83)   | 0.002  |
| PCB 52                                           | 0.08 ± 0.05                        | 0.05 (0.05, 0.20)  | 0.15 ± 0.22                        | 0.05 (0.05, 0.77)   | 0.92   |
| PCB 101                                          | 0.31 ± 0.26                        | 0.38 (0.05, 0.78)  | 0.15 ± 0.15                        | 0.05 (0.05, 0.42)   | 0.09   |
| PCB 118                                          | 2.20 ± 1.11                        | 1.97 (0.88, 4.37)  | 3.87 ± 3.21                        | 3.39 (0.05, 12.1)   | 0.10   |
| PCB 138                                          | 15.6 ± 7.39                        | 15.0 (4.72, 28.9)  | 45.7 ± 22.8                        | 41.1 (15.7, 92.5)   | <0.001 |
| PCB 153                                          | 36.2 ± 15.8                        | 35.1 (15.3, 60.6)  | 74.7 ± 32.7                        | 72.5 (27.7, 133.7)  | 0.001  |
| PCB 170                                          | 17.8 ± 6.83                        | 18.4 (7.40, 30.2)  | 27.3 ± 13.0                        | 27.0 (8.17, 54.3)   | 0.02   |
| PCB 180                                          | 43.6 ± 17.5                        | 44.3 (20.7, 71.1)  | 72.1 ± 33.6                        | 70.7 (16.3, 135.1)  | 0.01   |
| Organochlorinated pesticides (ng/g lipid weight) |                                    |                    |                                    |                     |        |
| o,p'-DDE                                         | 0.07 ± 0.05                        | 0.05 (0.05, 0.17)  | 0.05 ± 0.00                        | 0.05 (0.05, 0.05)   | 0.04   |
| p,p'-DDE                                         | 96.1 ± 61.5                        | 76.1 (39.0, 280.4) | 196.4 ± 151.7                      | 154.0 (87.4, 708.2) | 0.001  |
| o,p'-DDD                                         | 0.05 ± 0.00                        | 0.05 (0.05, 0.05)  | 0.05 ± 0.00                        | 0.05 (0.05, 0.05)   | 1.00   |
| p,p'-DDD                                         | 1.30 ± 1.83                        | 0.66 (0.12, 7.63)  | 3.45 ± 6.21                        | 1.68 (0.05, 25.91)  | 0.02   |
| o,p'-DDT                                         | 0.31 ± 0.17                        | 0.25 (0.25, 0.86)  | 0.45 ± 0.79                        | 0.25 (0.25, 3.4)    | 0.60   |
| p,p'-DDT                                         | 7.68 ± 14.1                        | 3.48 (0.25, 57.9)  | 6.21 ± 21.2                        | 0.25 (0.25, 85.4)   | 0.001  |
| HCB                                              | 14.4 ± 6.40                        | 12.5 (7.64, 29.1)  | 18.8 ± 8.76                        | 15.8 (8.77, 37.0)   | 0.09   |
| α-HCH                                            | 0.13 ± 0.21                        | 0.05 (0.05, 0.75)  | 0.05 ± 0.00                        | 0.05 (0.05, 0.05)   | 0.07   |
| β-HCH                                            | 2.58 ± 2.85                        | 2.44 (0.05, 11.5)  | 2.01 ± 6.26                        | 0.05 (0.05, 24.6)   | 0.01   |
| γ-HCH                                            | 0.06 ± 0.04                        | 0.05 (0.05, 0.20)  | 0.43 ± 1.10                        | 0.05 (0.05, 4.39)   | 0.25   |
| Brominated flame retardants (ng/g lipid weight)  |                                    |                    |                                    |                     |        |
| BDE 47                                           | 2.90 ± 4.96                        | 1.02 (0.05, 17.9)  | 1.95 ± 0.55                        | 1.94 (1.19, 3.01)   | 0.004  |
| BDE 99                                           | 0.15 ± 0.00                        | 0.15 (0.15, 0.15)  | 0.24 ± 0.29                        | 0.15 (0.15, 1.28)   | 0.15   |
| BDE 100                                          | 0.15 ± 0.00                        | 0.15 (0.15, 0.15)  | 0.17 ± 0.09                        | 0.15 (0.15, 0.51)   | 0.32   |
| BDE 153                                          | 1.03 ± 3.54                        | 0.15 (0.15, 14.3)  | 1.20 ± 3.98                        | 0.15 (0.15, 16.1)   | 0.31   |
| BDE 154                                          | 0.15 ± 0.00                        | 0.15 (0.15, 0.15)  | 0.15 ± 0.00                        | 0.15 (0.15, 0.15)   | 1.00   |

|         |             |                   |             |                   |      |
|---------|-------------|-------------------|-------------|-------------------|------|
| BDE 183 | 0.75 ± 2.40 | 0.15 (0.15, 9.74) | 0.74 ± 2.36 | 0.15 (0.15, 9.58) | 0.96 |
| BDE 209 | 1.82 ± 2.23 | 0.75 (0.75, 8.65) | 4.09 ± 13.4 | 0.75 (0.75, 54.2) | 0.10 |

**Per- and polyfluoroalkylated substances (ng/mL plasma)**

|         |             |                   |             |                   |      |
|---------|-------------|-------------------|-------------|-------------------|------|
| PFBS    | 0.01 ± 0.00 | 0.01 (0.01, 0.01) | 0.01 ± 0.00 | 0.01 (0.01, 0.02) | 0.04 |
| PFHxS   | 0.34 ± 0.18 | 0.41 (0.07, 0.66) | 0.35 ± 0.18 | 0.41 (0.08, 0.68) | 0.90 |
| PFOS    | 3.49 ± 1.82 | 3.94 (0.46, 6.32) | 3.45 ± 1.68 | 4.2 (0.53, 5.44)  | 0.97 |
| PFDS    | 0.01 ± 0.00 | 0.01 (0.01, 0.01) | 0.01 ± 0.00 | 0.01 (0.01, 0.02) | 0.32 |
| PFBA    | 0.02 ± 0.01 | 0.02 (0.01, 0.05) | 0.03 ± 0.01 | 0.02 (0.01, 0.05) | 0.56 |
| PFHpA   | 0.02 ± 0.02 | 0.01 (0.01, 0.07) | 0.02 ± 0.02 | 0.01 (0.01, 0.08) | 0.85 |
| PFOA    | 1.05 ± 0.61 | 1.02 (0.09, 2.59) | 1.18 ± 0.64 | 1.21 (0.14, 2.90) | 0.41 |
| PFNA    | 0.55 ± 0.29 | 0.62 (0.06, 1.01) | 0.60 ± 0.30 | 0.65 (0.07, 1.09) | 0.62 |
| PFDA    | 0.26 ± 0.14 | 0.25 (0.06, 0.55) | 0.37 ± 0.19 | 0.34 (0.07, 0.72) | 0.12 |
| PFUdA   | 0.08 ± 0.04 | 0.09 (0.03, 0.15) | 0.12 ± 0.07 | 0.12 (0.04, 0.31) | 0.06 |
| PFDaA   | 0.02 ± 0.02 | 0.02 (0.01, 0.09) | 0.03 ± 0.02 | 0.02 (0.01, 0.07) | 0.97 |
| PFTTrDA | 0.01 ± 0.01 | 0.01 (0.01, 0.03) | 0.01 ± 0.01 | 0.01 (0.01, 0.05) | 0.71 |
| PFTeDA  | 0.01 ± 0.01 | 0.01 (0.01, 0.02) | 0.01 ± 0.00 | 0.01 (0.01, 0.02) | 0.38 |

**Monohydroxylated PAH metabolites (µg/g creatinine)**

|             |             |                   |             |                   |      |
|-------------|-------------|-------------------|-------------|-------------------|------|
| 1-OH-NAP    | 0.59 ± 0.58 | 0.38 (0.04, 1.98) | 1.23 ± 2.81 | 0.42 (0.07, 11.7) | 0.73 |
| 2-OH-NAP    | 4.68 ± 3.34 | 3.22 (1.39, 13.3) | 5.38 ± 5.87 | 3.21 (1.31, 24.6) | 0.82 |
| 2-OH-FLUO   | 0.44 ± 0.32 | 0.38 (0.01, 1.25) | 0.35 ± 0.33 | 0.29 (0.09, 1.42) | 0.26 |
| 1-OH-PHEN   | 0.20 ± 0.19 | 0.13 (0.07, 0.80) | 0.26 ± 0.26 | 0.18 (0.04, 1.02) | 0.41 |
| 2-OH-PHEN   | 0.08 ± 0.10 | 0.06 (0.03, 0.44) | 0.12 ± 0.08 | 0.09 (0.04, 0.33) | 0.03 |
| 3-OH-PHEN   | 0.10 ± 0.07 | 0.08 (0.03, 0.27) | 0.11 ± 0.10 | 0.08 (0.02, 0.35) | 0.90 |
| 4-OH-PHEN   | 0.02 ± 0.03 | 0.02 (0.00, 0.09) | 0.06 ± 0.08 | 0.02 (0.01, 0.28) | 0.68 |
| 9-OH-PHEN   | 0.06 ± 0.03 | 0.06 (0.03, 0.11) | 0.20 ± 0.33 | 0.08 (0.03, 1.29) | 0.25 |
| 1-OH-pyrene | 0.08 ± 0.06 | 0.06 (0.01, 0.20) | 0.10 ± 0.06 | 0.10 (0.01, 0.23) | 0.39 |

**Supplementary Table S2.** Concentrations of plasma POPs and urinary PAH metabolites in samples collected in Prague, a metropolitan locality

| Variable                                         | Prague (N=56) (Season 1) |                    | Prague (N=56) (Season 2) |                     | P      |
|--------------------------------------------------|--------------------------|--------------------|--------------------------|---------------------|--------|
|                                                  | Mean ± SD                | Median (min, max)  | Mean ± SD                | Median (min, max)   |        |
| Polychlorinated biphenyls (ng/g lipid weight)    |                          |                    |                          |                     |        |
| PCB 28                                           | 1.02 ± 1.23              | 0.54 (0.05, 4.33)  | 0.60 ± 1.02              | 0.31 (0.05, 7.00)   | 0.10   |
| PCB 52                                           | 0.06 ± 0.04              | 0.05 (0.05, 0.29)  | 0.34 ± 0.53              | 0.05 (0.05, 3.31)   | <0.001 |
| PCB 101                                          | 0.31 ± 0.43              | 0.05 (0.05, 2.39)  | 0.40 ± 0.73              | 0.05 (0.05, 3.26)   | 0.66   |
| PCB 118                                          | 2.08 ± 1.57              | 2.02 (0.05, 8.09)  | 4.28 ± 2.55              | 3.48 (1.19, 11.9)   | <0.001 |
| PCB 138                                          | 19.7 ± 15.6              | 16.7 (3.47, 78.3)  | 52.2 ± 41.1              | 39.9 (4.58, 224.6)  | <0.001 |
| PCB 153                                          | 43.3 ± 34.6              | 35.3 (5.99, 191.6) | 85.6 ± 69.5              | 63.0 (10.2, 398.6)  | <0.001 |
| PCB 170                                          | 24.3 ± 18.8              | 19.9 (3.27, 98.1)  | 34.4 ± 27.4              | 27.5 (4.10, 148.3)  | 0.01   |
| PCB 180                                          | 58.6 ± 44.5              | 47.1 (6.86, 232.3) | 96.4 ± 77.7              | 82.9 (9.29, 396.3)  | 0.001  |
| Organochlorinated pesticides (ng/g lipid weight) |                          |                    |                          |                     |        |
| o,p'-DDE                                         | 0.23 ± 0.30              | 0.15 (0.05, 2.00)  | 0.07 ± 0.11              | 0.05 (0.05, 0.65)   | <0.001 |
| p,p'-DDE                                         | 81.9 ± 87.8              | 55.4 (11.8, 574.2) | 180.6 ± 172.2            | 124.5 (24.7, 997.4) | <0.001 |
| o,p'-DDD                                         | 0.09 ± 0.11              | 0.05 (0.05, 0.67)  | 0.09 ± 0.13              | 0.05 (0.05, 0.65)   | 0.30   |
| p,p'-DDD                                         | 0.91 ± 0.91              | 0.69 (0.05, 6.41)  | 1.61 ± 3.07              | 1.09 (0.05, 22.8)   | 0.05   |
| o,p'-DDT                                         | 0.27 ± 0.13              | 0.25 (0.25, 1.23)  | 0.27 ± 0.15              | 0.25 (0.25, 1.33)   | 0.97   |
| p,p'-DDT                                         | 3.11 ± 7.70              | 0.25 (0.25, 56.9)  | 3.81 ± 12.22             | 0.25 (0.25, 88.8)   | 0.61   |
| HCB                                              | 12.1 ± 7.52              | 9.22 (2.28, 35.8)  | 19.1 ± 13.1              | 15.2 (4.54, 68.7)   | <0.001 |
| α-HCH                                            | 0.09 ± 0.31              | 0.05 (0.05, 2.35)  | 0.05 ± 0.00              | 0.05 (0.05, 0.05)   | 0.33   |
| β-HCH                                            | 2.74 ± 2.74              | 1.89 (0.05, 13.5)  | 4.18 ± 6.65              | 0.05 (0.05, 28.5)   | 0.17   |
| γ-HCH                                            | 0.17 ± 0.31              | 0.05 (0.05, 2.11)  | 0.65 ± 1.58              | 0.05 (0.05, 7.06)   | 0.34   |
| Brominated flame retardants (ng/g lipid weight)  |                          |                    |                          |                     |        |
| BDE 47                                           | 1.01 ± 0.98              | 0.74 (0.05, 3.87)  | 1.93 ± 0.87              | 1.81 (0.05, 5.08)   | <0.001 |
| BDE 99                                           | 0.24 ± 0.52              | 0.15 (0.15, 3.96)  | 0.29 ± 0.50              | 0.15 (0.15, 3.53)   | 0.07   |
| BDE 100                                          | 0.17 ± 0.12              | 0.15 (0.15, 1.03)  | 0.18 ± 0.15              | 0.15 (0.15, 1.14)   | 0.54   |
| BDE 153                                          | 0.16 ± 0.11              | 0.15 (0.15, 0.96)  | 0.26 ± 0.25              | 0.15 (0.15, 1.18)   | 0.002  |
| BDE 154                                          | 0.15 ± 0.00              | 0.15 (0.15, 0.15)  | 0.16 ± 0.07              | 0.15 (0.15, 0.65)   | 0.31   |

|         |             |                    |              |                    |      |
|---------|-------------|--------------------|--------------|--------------------|------|
| BDE 183 | 0.17 ± 0.17 | 0.15 (0.15, 0.15)  | 0.18 ± 0.19  | 0.15 (0.15, 1.50)  | 0.54 |
| BDE 209 | 5.65 ± 33.5 | 0.75 (0.75, 251.8) | 35.0 ± 118.5 | 0.75 (0.75, 618.2) | 0.73 |

**Per- and polyfluoroalkylated substances (ng/mL plasma)**

|         |             |                   |             |                   |       |
|---------|-------------|-------------------|-------------|-------------------|-------|
| PFBS    | 0.01 ± 0.01 | 0.01 (0.01, 0.11) | 0.01 ± 0.01 | 0.01 (0.01, 0.04) | 0.004 |
| PFHxS   | 0.39 ± 0.18 | 0.40 (0.04, 0.74) | 0.41 ± 0.19 | 0.43 (0.05, 0.80) | 0.63  |
| PFOS    | 3.23 ± 2.06 | 2.68 (0.26, 9.99) | 3.46 ± 1.81 | 3.35 (0.24, 7.20) | 0.34  |
| PFDS    | 0.01 ± 0.00 | 0.01 (0.01, 0.01) | 0.01 ± 0.00 | 0.01 (0.01, 0.01) | 0.31  |
| PFBA    | 0.03 ± 0.03 | 0.02 (0.01, 0.19) | 0.04 ± 0.08 | 0.02 (0.01, 0.48) | 0.92  |
| PFHpA   | 0.03 ± 0.02 | 0.02 (0.01, 0.12) | 0.03 ± 0.03 | 0.02 (0.01, 0.20) | 0.46  |
| PFOA    | 0.96 ± 0.49 | 0.96 (0.08, 2.27) | 1.04 ± 0.52 | 1.03 (0.08, 2.33) | 0.39  |
| PFNA    | 0.35 ± 0.18 | 0.34 (0.03, 0.93) | 0.41 ± 0.21 | 0.37 (0.04, 0.99) | 0.12  |
| PFDA    | 0.17 ± 0.09 | 0.16 (0.03, 0.47) | 0.22 ± 0.11 | 0.20 (0.04, 0.58) | 0.01  |
| PFUdA   | 0.07 ± 0.04 | 0.06 (0.01, 0.18) | 0.07 ± 0.04 | 0.06 (0.01, 0.20) | 0.88  |
| PFDoA   | 0.01 ± 0.01 | 0.01 (0.01, 0.08) | 0.02 ± 0.03 | 0.01 (0.01, 0.26) | 0.44  |
| PFTTrDA | 0.01 ± 0.01 | 0.01 (0.01, 0.05) | 0.01 ± 0.01 | 0.01 (0.01, 0.07) | 0.63  |
| PFTeDA  | 0.01 ± 0.00 | 0.01 (0.01, 0.03) | 0.01 ± 0.02 | 0.01 (0.01, 0.12) | 0.97  |

**Monohydroxylated PAH metabolites (µg/g creatinine)**

|             |             |                   |             |                   |      |
|-------------|-------------|-------------------|-------------|-------------------|------|
| 1-OH-NAP    | 0.46 ± 0.56 | 0.27 (0.01, 2.90) | 0.71 ± 1.33 | 0.35 (0.04, 9.04) | 0.16 |
| 2-OH-NAP    | 5.43 ± 5.88 | 2.91 (1.01, 22.8) | 3.83 ± 2.90 | 2.96 (0.77, 13.7) | 0.49 |
| 2-OH-FLUO   | 0.39 ± 0.35 | 0.29 (0.01, 2.26) | 0.29 ± 0.24 | 0.21 (0.11, 1.59) | 0.02 |
| 1-OH-PHEN   | 0.23 ± 0.27 | 0.16 (0.06, 1.84) | 0.20 ± 0.16 | 0.14 (0.04, 0.82) | 0.52 |
| 2-OH-PHEN   | 0.09 ± 0.09 | 0.07 (0.02, 0.51) | 0.13 ± 0.14 | 0.08 (0.03, 0.69) | 0.02 |
| 3-OH-PHEN   | 0.12 ± 0.11 | 0.09 (0.01, 0.53) | 0.09 ± 0.07 | 0.07 (0.02, 0.28) | 0.12 |
| 4-OH-PHEN   | 0.03 ± 0.03 | 0.02 (0.00, 0.11) | 0.03 ± 0.04 | 0.02 (0.00, 0.20) | 0.46 |
| 9-OH-PHEN   | 0.09 ± 0.09 | 0.07 (0.00, 0.39) | 0.10 ± 0.11 | 0.06 (0.02, 0.69) | 0.78 |
| 1-OH-pyrene | 0.07 ± 0.06 | 0.05 (0.01, 0.26) | 0.07 ± 0.04 | 0.06 (0.01, 0.25) | 0.42 |

**Supplementary Table S3.** Concentrations of plasma POPs and urinary PAH metabolites in samples collected in Ostrava, an industrial region

| Variable                                         | Ostrava (N=54) (Season 1) |                     | Ostrava (N=54) (Season 2) |                      | P      |
|--------------------------------------------------|---------------------------|---------------------|---------------------------|----------------------|--------|
|                                                  | Mean ± SD                 | Median (min, max)   | Mean ± SD                 | Median (min, max)    |        |
| Polychlorinated biphenyls (ng/g lipid weight)    |                           |                     |                           |                      |        |
| PCB 28                                           | 0.73 ± 0.99               | 0.05 (0.05, 4.02)   | 1.03 ± 1.41               | 0.65 (0.05, 6.16)    | 0.21   |
| PCB 52                                           | 0.13 ± 0.13               | 0.05(0.05, 0.58)    | 0.17 ± 0.23               | 0.05 (0.05, 1.07)    | 0.61   |
| PCB 101                                          | 0.36 ± 0.32               | 0.32 (0.05, 1.35)   | 0.14 ± 0.37               | 0.05 (0.05, 2.20)    | <0.001 |
| PCB 118                                          | 3.05 ± 2.38               | 2.41 (0.05, 13.55)  | 4.79 ± 3.19               | 4.20 (0.05, 17.50)   | 0.001  |
| PCB 138                                          | 28.89 ± 26.31             | 21.15 (2.94, 159.2) | 69.3 ± 53.0               | 60.8 (8.37, 280.0)   | <0.001 |
| PCB 153                                          | 71.1 ± 65.2               | 52.1 (5.76, 397.8)  | 128.5 ± 104.6             | 109.0 (14.8, 567.0)  | <0.001 |
| PCB 170                                          | 48.4 ± 45.5               | 33.2 (3.34, 281.1)  | 48.7 ± 39.3               | 40.1 (4.42, 227.0)   | 0.68   |
| PCB 180                                          | 111.1 ± 104.3             | 77.3 (59.5, 652.9)  | 156.9 ± 135.0             | 122.0 (11.3, 717.0)  | 0.03   |
| Organochlorinated pesticides (ng/g lipid weight) |                           |                     |                           |                      |        |
| o,p'-DDE                                         | 0.16 ± 0.18               | 0.05 (0.05, 1.07)   | 4.90 ± 35.3               | 0.05 (0.05, 257.3)   | <0.001 |
| p,p'-DDE                                         | 82.9 ± 87.4               | 62.0 (15.1, 587.1)  | 150.4 ± 134.6             | 117.00 (22.7, 873.0) | <0.001 |
| o,p'-DDD                                         | 0.07 ± 0.11               | 0.05 (0.05, 0.81)   | 0.05 ± 0.00               | 0.05 (0.05, 0.05)    | 0.08   |
| p,p'-DDD                                         | 0.72 ± 1.12               | 0.46 (0.05, 7.11)   | 2.09 ± 2.38               | 1.39 (0.05, 14.0)    | <0.001 |
| o,p'-DDT                                         | 0.25 ± 0.00               | 0.25 (0.25, 0.25)   | 0.35 ± 0.59               | 0.25 (0.25, 4.45)    | 0.15   |
| p,p'-DDT                                         | 3.01 ± 6.94               | 1.14 (0.25, 49.7)   | 3.79 ± 14.6               | 0.25 (0.25, 101.0)   | 0.004  |
| HCB                                              | 11.9 ± 6.42               | 11.1 (1.56, 33.1)   | 17.4 ± 10.1               | 14.6 (5.91, 52.5)    | 0.001  |
| α-HCH                                            | 0.89 ± 1.00               | 0.55 (0.05, 4.51)   | 0.06 ± 0.07               | 0.05 (0.05, 0.57)    | <0.001 |
| β-HCH                                            | 2.92 ± 2.64               | 2.59 (0.05, 9.59)   | 5.74 ± 7.14               | 3.64 (0.05, 31.3)    | 0.21   |
| γ-HCH                                            | 0.29 ± 0.42               | 0.05 (0.05, 1.89)   | 0.89 ± 4.44               | 0.05 (0.05, 29.2)    | <0.001 |
| Brominated flame retardants (ng/g lipid weight)  |                           |                     |                           |                      |        |
| BDE 47                                           | 4.47 ± 4.37               | 2.82 (0.05, 15.0)   | 1.84 ± 1.85               | 1.51 (0.62, 14.1)    | 0.01   |
| BDE 99                                           | 0.68 ± 3.44               | 0.15 (0.15, 25.4)   | 0.59 ± 1.22               | 0.15 (0.15, 8.11)    | 0.004  |
| BDE 100                                          | 0.16 ± 0.06               | 0.15 (0.15, 0.54)   | 0.20 ± 0.27               | 0.15 (0.15, 2.00)    | 0.95   |
| BDE 153                                          | 0.21 ± 0.21               | 0.15 (0.15, 1.07)   | 0.50 ± 0.67               | 0.15 (0.15, 3.24)    | 0.001  |
| BDE 154                                          | 0.15 ± 0.00               | 0.15 (0.15, 0.15)   | 0.18 ± 0.19               | 0.15 (0.15, 1.55)    | 0.31   |

|         |             |                    |             |                    |      |
|---------|-------------|--------------------|-------------|--------------------|------|
| BDE 183 | 0.20 ± 0.25 | 0.15 (0.15, 1.62)  | 0.29 ± 0.50 | 0.15 (0.15, 2.67)  | 0.24 |
| BDE 209 | 8.66 ± 34.4 | 1.33 (0.75, 251.0) | 46.3 ± 90.6 | 0.75 (0.75, 354.0) | 0.39 |

**Per- and polyfluoroalkylated substances (ng/mL plasma)**

|         |               |                      |               |                      |      |
|---------|---------------|----------------------|---------------|----------------------|------|
| PFBS    | 0.005 ± 0.00  | 0.005 (0.005, 0.005) | 0.006 ± 0.003 | 0.005 (0.005, 0.02)  | 0.02 |
| PFHxS   | 0.57 ± 0.35   | 0.52 (0.05, 1.73)    | 0.58 ± 0.31   | 0.53 (0.04, 1.79)    | 0.73 |
| PFOS    | 3.35 ± 3.20   | 2.46 (0.27, 16.6)    | 3.30 ± 3.45   | 2.25 (0.35, 18.4)    | 0.52 |
| PFDS    | 0.005 ± 0.00  | 0.005 (0.005, 0.005) | 0.005 ± 0.00  | 0.005 (0.005, 0.005) | 1.00 |
| PFBA    | 0.03 ± 0.04   | 0.02 (0.005, 0.33)   | 0.03 ± 0.02   | 0.03 (0.005, 0.17)   | 0.01 |
| PFHpA   | 0.02 ± 0.02   | 0.02 (0.005, 0.08)   | 0.02 ± 0.02   | 0.01 (0.005, 0.15)   | 0.38 |
| PFOA    | 0.98 ± 0.59   | 0.85 (0.10, 2.41)    | 0.98 ± 0.58   | 0.87 (0.11, 2.39)    | 0.91 |
| PFNA    | 0.41 ± 0.35   | 0.34 (0.03, 2.07)    | 0.45 ± 0.45   | 0.36 (0.04, 3.00)    | 0.72 |
| PFDA    | 0.15 ± 0.09   | 0.12 (0.03, 0.46)    | 0.16 ± 0.14   | 0.13 (0.03, 0.72)    | 0.89 |
| PFUdA   | 0.07 ± 0.04   | 0.06 (0.02, 0.17)    | 0.07 ± 0.06   | 0.06 (0.02, 0.32)    | 0.54 |
| PFDoA   | 0.01 ± 0.01   | 0.01 (0.005, 0.06)   | 0.02 ± 0.02   | 0.01 (0.005, 0.10)   | 0.77 |
| PFTTrDA | 0.01 ± 0.01   | 0.005 (0.005, 0.06)  | 0.01 ± 0.01   | 0.005 (0.005, 0.09)  | 0.95 |
| PFTeDA  | 0.005 ± 0.001 | 0.005 (0.005, 0.01)  | 0.006 ± 0.004 | 0.005 (0.005, 0.03)  | 0.16 |

**Monohydroxylated PAH metabolites (µg/g creatinine)**

|             |             |                    |             |                    |       |
|-------------|-------------|--------------------|-------------|--------------------|-------|
| 1-OH-NAP    | 0.54 ± 0.70 | 0.31 (0.008, 3.93) | 1.45 ± 2.82 | 0.60 (0.13, 19.0)  | 0.001 |
| 2-OH-NAP    | 5.15 ± 4.93 | 3.99 (0.83, 27.0)  | 4.26 ± 3.09 | 3.41 (0.63, 18.0)  | 0.74  |
| 2-OH-FLUO   | 0.49 ± 0.39 | 0.37 (0.008, 1.66) | 0.59 ± 0.89 | 0.30 (0.11, 5.91)  | 0.83  |
| 1-OH-PHEN   | 0.32 ± 0.25 | 0.23 (0.08, 1.14)  | 0.34 ± 0.29 | 0.23 (0.06, 1.65)  | 0.81  |
| 2-OH-PHEN   | 0.13 ± 0.11 | 0.08 (0.03, 0.60)  | 0.17 ± 0.14 | 0.13 (0.04, 0.78)  | 0.01  |
| 3-OH-PHEN   | 0.18 ± 0.16 | 0.15 (0.03, 0.90)  | 0.19 ± 0.19 | 0.12 (0.03, 1.13)  | 0.66  |
| 4-OH-PHEN   | 0.04 ± 0.03 | 0.03 (0.004, 0.17) | 0.05 ± 0.04 | 0.03 (0.009, 0.25) | 0.18  |
| 9-OH-PHEN   | 0.09 ± 0.07 | 0.06 (0.02, 0.31)  | 0.14 ± 0.16 | 0.08 (0.004, 0.72) | 0.13  |
| 1-OH-pyrene | 0.16 ± 0.16 | 0.10 (0.008, 0.84) | 0.13 ± 0.09 | 0.11 (0.05, 0.41)  | 0.87  |

**Supplementary Table S4.** Associations of oxidative stress markers with environmental pollutants, parameters of antioxidant response and inflammation

|               | 8-oxodG                 |         |         | 15-F2t-IsoP            |         |         |
|---------------|-------------------------|---------|---------|------------------------|---------|---------|
|               | B, 95% CI               | p-value | q-value | B, 95% CI              | p-value | q-value |
| Age           | 0.007 (-0.01, 0.03)     | 0.49    | 0.83    | -0.08 (-0.43, 0.27)    | 0.65    | 0.82    |
| BMI           | -0.03 (-0.07, 0.006)    | 0.11    | 0.37    | -0.55 (-1.08, -0.03)   | 0.04    | 0.19    |
| Cotinine      | 0.001 (0.000, 0.002)    | 0.01    | 0.12    | -0.009 (-0.02, -0.001) | 0.02    | 0.15    |
| Education     | -0.16 (-0.65, 0.33)     | 0.52    | 0.83    | -1.18 (-7.29, 4.93)    | 0.71    | 0.87    |
| Locality      | 0.02 (-0.22, 0.27)      | 0.87    | 0.92    | 5.07 (1.76, 8.38)      | 0.003   | 0.04    |
| B[a]P         | -0.09 (-0.29, 0.12)     | 0.40    | 0.78    | -3.99 (-9.00, 1.01)    | 0.12    | 0.39    |
| PM2.5         | 0.02 (0.004, 0.04)      | 0.01    | 0.12    | -0.18 (-0.39, 0.03)    | 0.09    | 0.33    |
| Ozone         | 0.004 (-0.002, 0.01)    | 0.24    | 0.61    | -0.007 (-0.087, 0.073) | 0.86    | 0.96    |
| SOD           | 0.00 (-0.01, 0.01)      | 0.94    | 0.96    | 0.05 (-0.08, 0.18)     | 0.48    | 0.77    |
| CAT           | -0.001 (-0.01, 0.009)   | 0.80    | 0.92    | 0.20 (0.05, 0.34)      | 0.007   | 0.06    |
| GPX           | 0.002 (-0.001, 0.005)   | 0.14    | 0.40    | -0.02 (-0.06, 0.01)    | 0.20    | 0.49    |
| ORAC          | -0.20 (-0.41, 0.01)     | 0.06    | 0.24    | -0.75 (-3.43, 1.94)    | 0.59    | 0.78    |
| TNF- $\alpha$ | 0.001 (-0.002, 0.003)   | 0.53    | 0.83    | -0.002 (-0.05, 0.04)   | 0.91    | 0.96    |
| IL-1 $\beta$  | 0.000 (-0.002, 0.001)   | 0.89    | 0.92    | 0.02 (-0.001, 0.04)    | 0.07    | 0.27    |
| IL-6          | 0.002 (0.001, 0.003)    | <0.001  | <0.001  | 0.04 (0.03, 0.05)      | <0.001  | <0.001  |
| PCB 28        | -0.07 (-0.15, 0.02)     | 0.11    | 0.37    | -0.69 (-2.28, 0.90)    | 0.40    | 0.68    |
| PCB 52        | 0.40 (-0.26, 1.06)      | 0.24    | 0.63    | -2.33 (-7.60, 2.97)    | 0.39    | 0.68    |
| PCB 101       | 0.03 (-0.20, 0.26)      | 0.78    | 0.92    | -4.94 (-8.60, -1.28)   | 0.008   | 0.06    |
| PCB 118       | 0.006 (-0.06, 0.07)     | 0.85    | 0.92    | -0.02 (-0.82, 0.78)    | 0.96    | 0.96    |
| PCB 180       | 0.000 (-0.002, 0.001)   | 0.77    | 0.92    | 0.007 (-0.02, 0.03)    | 0.59    | 0.78    |
| o,p'-DDE      | -0.004 (-0.005, -0.003) | <0.001  | <0.001  | -0.01 (-0.02, -0.001)  | 0.04    | 0.19    |

|               |                       |        |        |                        |        |        |
|---------------|-----------------------|--------|--------|------------------------|--------|--------|
| p,p'-DDE      | 0.000 (-0.001, 0.002) | 0.49   | 0.83   | -0.005 (-0.02, 0.01)   | 0.59   | 0.78   |
| o,p'-DDD      | 1.49 (0.25, 2.72)     | 0.02   | 0.14   | 10.02 (-13.31, 33.36)  | 0.40   | 0.68   |
| p,p'-DDD      | -0.01 (-0.05, 0.03)   | 0.58   | 0.84   | 0.46 (-0.06, 0.98)     | 0.08   | 0.31   |
| o,p'-DDT      | 0.07 (-0.27, 0.41)    | 0.70   | 0.92   | 0.36 (-5.27, 5.99)     | 0.90   | 0.96   |
| p,p'-DDT      | -0.003 (-0.01, 0.005) | 0.41   | 0.78   | 0.05 (-0.06, 0.16)     | 0.39   | 0.68   |
| HCB           | 0.009 (-0.009, 0.03)  | 0.32   | 0.77   | -0.08 (-0.35, 0.19)    | 0.55   | 0.78   |
| $\alpha$ -HCH | -0.12 (-0.33, 0.09)   | 0.26   | 0.65   | 3.89 (-1.18, 8.96)     | 0.13   | 0.40   |
| $\beta$ -HCH  | 0.02 (-0.02, 0.05)    | 0.36   | 0.78   | -0.20 (-0.60, 0.19)    | 0.31   | 0.62   |
| $\gamma$ -HCH | 0.01 (-0.01, 0.03)    | 0.41   | 0.78   | -0.25 (-0.58, 0.09)    | 0.14   | 0.40   |
| BDE 47        | 0.004 (-0.04, 0.05)   | 0.85   | 0.92   | -0.73 (-1.23, -0.22)   | 0.005  | 0.05   |
| BDE 99        | 0.02 (-0.04, 0.07)    | 0.52   | 0.83   | 3.42 (1.97, 4.88)      | <0.001 | <0.001 |
| BDE 100       | -0.73 (-1.36, -0.09)  | 0.03   | 0.15   | -5.39 (-10.44, -0.34)  | 0.04   | 0.19   |
| BDE 153       | 0.04 (0.009, 0.07)    | 0.01   | 0.12   | -0.21 (-0.82, 0.40)    | 0.50   | 0.78   |
| BDE 154       | -1.00 (-1.47, -0.54)  | <0.001 | <0.001 | -8.15 (-10.60, -5.71)  | <0.001 | <0.001 |
| BDE 209       | 0.001 (-0.002, 0.004) | 0.67   | 0.92   | -0.01 (-0.02, 0.004)   | 0.18   | 0.47   |
| PFBS          | -4.88 (-16.24, 6.49)  | 0.40   | 0.78   | -91.8 (-183.8, 0.35)   | 0.05   | 0.23   |
| PFHxS         | 0.60 (0.04, 1.16)     | 0.04   | 0.17   | 0.25 (-6.69, 7.19)     | 0.94   | 0.96   |
| PFOS          | 0.05 (0.003, 0.11)    | 0.04   | 0.17   | -0.48 (-1.34, 0.39)    | 0.28   | 0.61   |
| PFDS          | -9.02 (-74.16, 56.12) | 0.79   | 0.92   | 270.6 (-836.2, 1377.4) | 0.63   | 0.82   |
| PFBA          | 4.62 (0.63, 8.61)     | 0.02   | 0.15   | -3.83 (-57.0, 49.3)    | 0.89   | 0.96   |
| PFHpA         | 5.51 (-1.60, 12.62)   | 0.13   | 0.40   | -44.7 (-118.3, 28.9)   | 0.23   | 0.54   |
| PFOA          | 0.30 (-0.01, 0.61)    | 0.06   | 0.24   | -3.29 (-7.61, 1.04)    | 0.14   | 0.40   |
| PFDA          | -0.10 (-1.39, 1.18)   | 0.88   | 0.92   | -6.72 (-23.57, 10.13)  | 0.43   | 0.72   |
| PFUdA         | -0.63 (-4.20, 2.94)   | 0.73   | 0.92   | -25.1 (-72.9, 22.8)    | 0.31   | 0.62   |
| 1-OH-NAP      | -0.06 (-0.12, -0.003) | 0.04   | 0.17   | -0.06 (-0.89, 0.77)    | 0.89   | 0.96   |
| 2-OH-NAP      | -0.02 (-0.05, 0.01)   | 0.23   | 0.63   | 0.04 (-0.36, 0.44)     | 0.83   | 0.96   |
| 2-OH-FLUO     | 0.07 (-0.19, 0.33)    | 0.59   | 0.84   | -0.48 (-4.38, 3.43)    | 0.81   | 0.96   |
| 1-OH-PHEN     | 0.12 (-0.48, 0.71)    | 0.71   | 0.92   | 0.97 (-7.62, 9.56)     | 0.83   | 0.96   |



|             |                     |      |      |                       |      |      |
|-------------|---------------------|------|------|-----------------------|------|------|
| 2-OH-PHEN   | 0.005 (-1.30, 1.30) | 1.00 | 1.00 | -5.03 (-21.35, 11.29) | 0.55 | 0.78 |
| 3-OH-PHEN   | -0.30 (-1.19, 0.60) | 0.52 | 0.83 | 9.44 (-4.59, 23.46)   | 0.19 | 0.47 |
| 4-OH-PHEN   | -1.48 (-4.50, 1.54) | 0.34 | 0.78 | 1.21 (-42.65, 45.08)  | 0.96 | 0.96 |
| 9-OH-PHEN   | 0.36 (-0.89, 1.62)  | 0.57 | 0.84 | -7.66 (-21.79, 6.46)  | 0.29 | 0.61 |
| 1-OH-pyrene | 0.24 (-1.84, 2.31)  | 0.82 | 0.92 | 6.72 (-17.66, 31.10)  | 0.59 | 0.78 |

---
