# Supplementary material for: Oxidative Stress and Antioxidant Response in Populations of the Czech Republic Exposed to Various Levels of Environmental Pollutants
Source: MDPI journal article supplement (doi:10.3390/ijerph19063609), 2022-03-18

Supplementary Figure S1. A map of the Czech Republic with highlighted localities in which analyzed samples were collected.

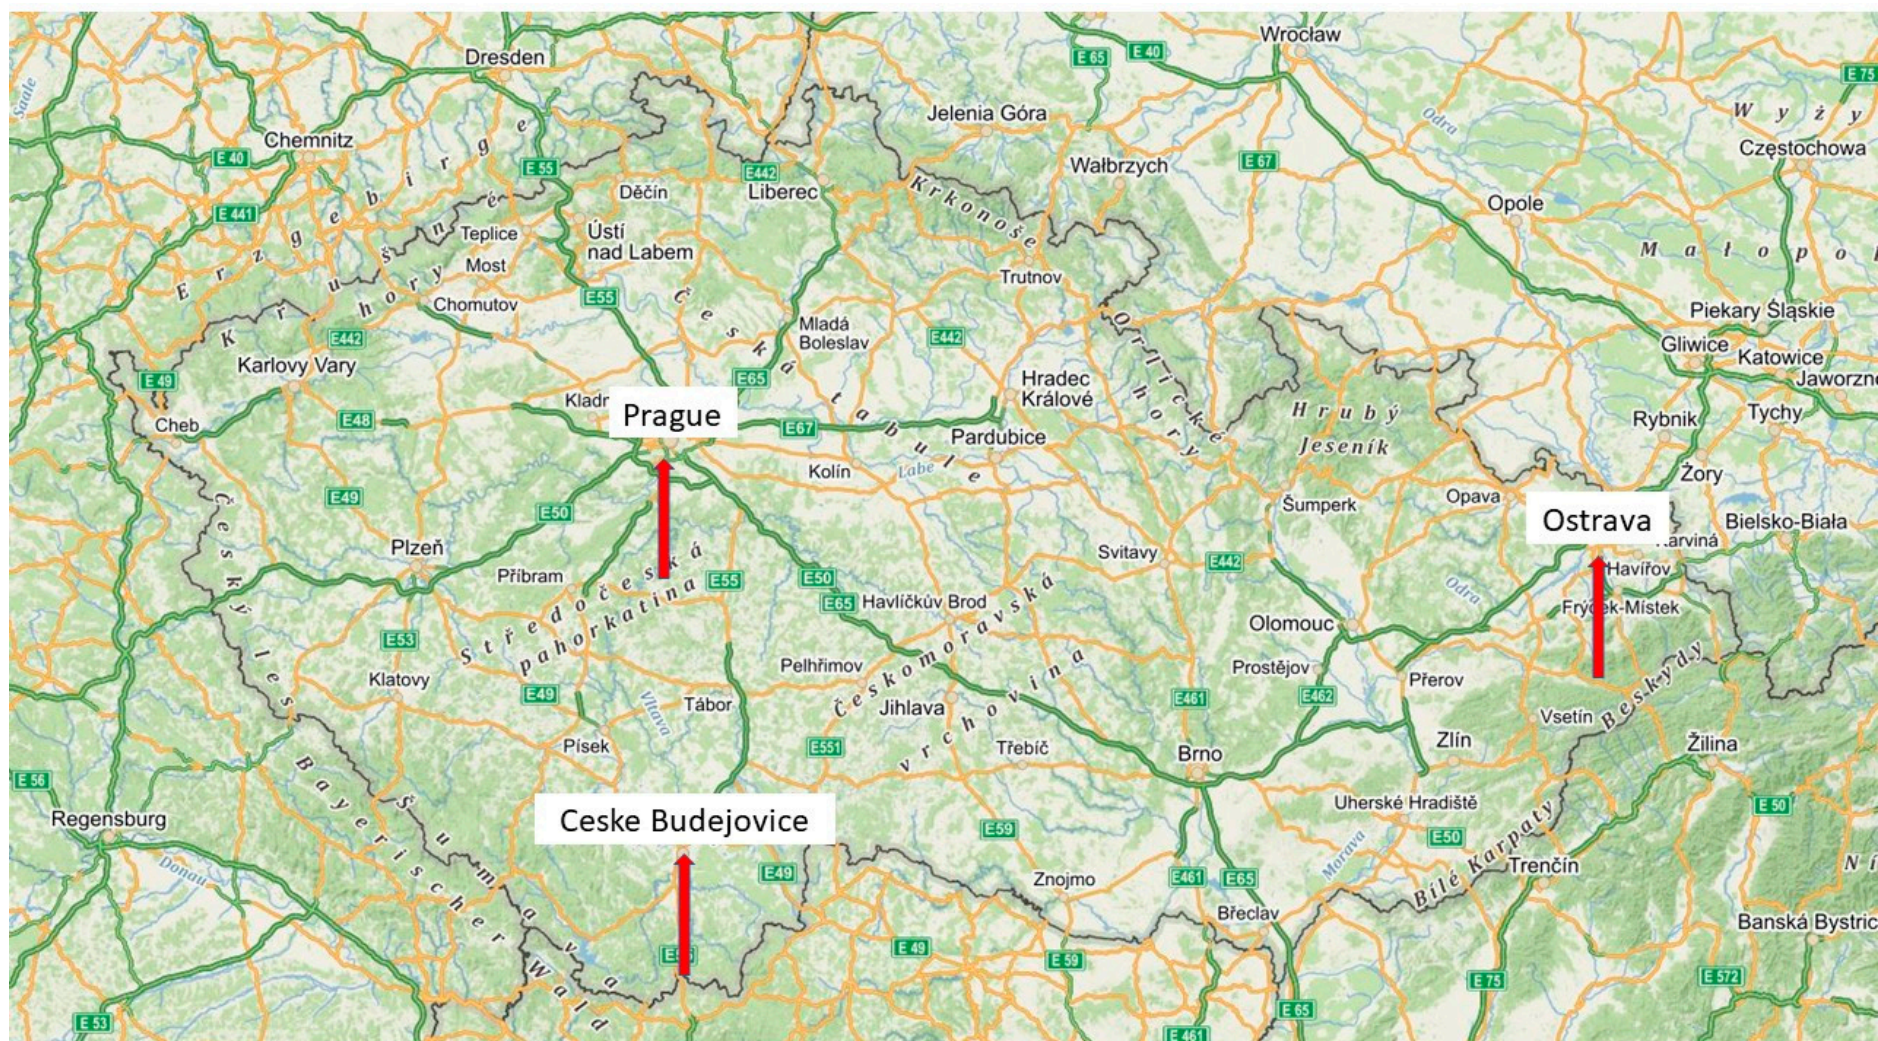

Supplement: s1 [file s1]
